# Supplementary material for: Stage-Specific Gene Expression Profiles in Multiple Sclerosis Cortical Lesions Identified via Spatial Transcriptomics
Source: Research Square preprint supplement (doi:10.21203/rs.3.rs-7270797/v1), 2025-08-19
Supplement: Supplementary file 1 [file 0885154000bf09e2bde0895e.docx]

**Supplementary Table 3. Gene Ontology (GO) enrichment analysis of upregulated differentially expressed genes (DEGs) across the 7 analyzed samples, performed using the CompareCluster function.** The table lists the top 20 significantly enriched GO terms per group, along with the associated genes and corresponding p-values.

| **Cluster** | **Description** | **p-value** | **Gene ID** |
| --- | --- | --- | --- |
| CTRL | modulation of chemical synaptic transmission | 3.8E-07 | *SLC1A3, ATP1A2, RGS4, MEF2C, GABBR1, JPH4, NLGN4Y, SEPTIN5, CAMKV, GRIN2C, CHRM1, UNC13A, GPER1, CUX2, AKAP5, LZTS1, CHRDL1, DTNBP1, VGF, NR2E1, LRRTM1, CCL2, BDNF, TSHZ3, GRM2, SLC6A6, CA7, NTNG1, CPLX3, ADORA2A, DCC, LRFN2, SLC7A10, NFATC4, HAP1, WNT7A, GRIN2D, SHANK1, EGR2* |
| CTRL | regulation of monoatomic ion transmembrane transport | 5.5E-08 | *NDUFA4, ATP1A2, FXYD1, RGS4, VDAC1, SCN3B, JPH4, CAMK2D, KCNH3, GRIN2C, GPER1, CACNB3, KCNAB1, AKAP5, KCNJ4, KCNV1, PTPN3, CORO1A, HAMP, P2RX2, CASQ1, METTL21C, CCL2, GRP, CACNA1G, KCNH4, CRHR1, KCNS2, FGF11, P2RX5, KCNS3, CLIC5, RNF207, CACNA1F, GSTM2, KCNAB3, HAP1, GRIN2D, NPPA* |
| CTRL | regulation of membrane potential | 5.86E-07 | *MLLT11, ATP1A2, ATP5IF1, FXYD1, RGS4, MEF2C, SCN3B, GABBR1, GABRD, CAMK2D, KCNH3, GRIN2C, CHRM1, GPER1, CACNB3, CUX2, GABRA2, STOX1, PTPN3, P2RX2, NDP, GLRA2, CACNA1G, KCNH4, ADORA2A, SRC, P2RX5, RNF207, HTR3B, CNGB1, DSP, WNT7A, GRIN2D, SHANK1, SLC4A11, NPPA* |
| CTRL | regulation of nervous system development | 2.25E-06 | *VEGFA, ID2, RTN4R, GPER1, LHX2, BRINP1, CUX2, BHLHE40, LRTM2, IL33, RARB, AGRN, NR2E1, HES5, LRRTM1, BDNF, SEMA4F, FLRT3, SEMA4A, ARMCX5-GPRASP2, CUL7, SEMA5B, DCC, SEMA3D, TRPV2, NFATC4, HAPLN1, FSTL4, HAP1, WNT7A, ASCL2, EGR2, HAPLN3, WNT2, DRAXIN, VEGFC* |
| CTRL | synapse organization | 1.26E-05 | *MEF2C, BSN, CTNNA2, NLGN4Y, CAMKV, NGEF, CBLN4, UNC13A, CAMK1, CACNB3, ICAM5, CUX2, GABRA2, PPFIA4, LZTS1, LRTM2, CHRDL1, DTNBP1, CDH8, P2RX2, CPNE6, AGRN, LRRTM1, BDNF, RAC3, FLRT3, SEMA4A, ARMCX5-GPRASP2, NTNG1, LRFN2, NFATC4, WNT7B, WNT7A, SHANK1, PCDHB11* |
| CTRL | cell junction assembly | 1.45E-05 | *VEGFA, HOPX, DMTN, MEF2C, BSN, NLGN4Y, CLDN10, CBLN4, ICAM5, FRMPD2, CUX2, GABRA2, LZTS1, LRTM2, CDH8, AGRN, LRRTM1, BDNF, CAMSAP3, FLRT3, MPP7, SEMA4A, ARMCX5-GPRASP2, SRC, THSD1, EPHA3, SH3BP1, PKP1, WNT7A, PCDHB11, CDH3, LAMA3, RHOD* |
| CTRL | regulation of metal ion transport | 1.29E-06 | *ATP1A2, FXYD1, RGS4, VDAC1, SCN3B, JPH4, CAMK2D, GPER1, CACNB3, KCNAB1, AKAP5, PTPN3, CORO1A, HAMP, P2RX2, CASQ1, METTL21C, PDGFRB, CCL2, VIP, GRP, ADORA2A, CRHR1, KCNS2, MCHR1, FGF11, P2RX5, RNF207, TRPV2, GSTM2, KCNAB3, HAP1, NPPA* |
| CTRL | regulation of neuron projection development | 4.82E-05 | *ITM2C, VEGFA, PAK1, PACSIN1, CTNNA2, RTN4R, NGEF, CAMK1, CUX2, LZTS1, DTNBP1, NR2E1, BDNF, RTN4RL1, SEMA4F, SEMA4A, ARMCX5-GPRASP2, NTNG1, CUL7, SEMA5B, DCC, ATOH7, PLK5, EPHA3, SEMA3D, TRPV2, NFATC4, ALKAL2, FSTL4, WNT7A, DRAXIN, MINAR1* |
| CTRL | amide transport | 2.52E-06 | *SLC1A2, SLC1A3, CPE, ATP1A2, PTPRN2, GABBR1, PTPRN, SLC17A6, GPER1, SLC5A6, NNAT, DTNBP1, C2CD2L, RBP4, VGF, GRM2, VIP, GRP, SLC15A2, CPLX3, ADORA2A, CRHR1, TFR2, INHBB, SMPD3, NOS2, PCK2, CRH, GPR68, AQP3* |
| CTRL | eye development | 0.000112 | *VEGFA, C12orf57, SLC17A6, CRYBB2, LHX2, RORB, MEIS3, CHRDL1, DTNBP1, RBP4, MYOM2, TMOD1, RARB, PDGFRB, NR2E1, HES5, NDP, ALDH1A3, CRB1, ATOH7, PRPH2, WNT7B, WNT7A, COL5A1, PLAAT1, FREM2, WNT2, PROM1* |
| CTRL | muscle cell differentiation | 0.000774 | *VEGFA, HOPX, TNNT1, RGS4, MEF2C, TMOD2, ID2, CAMK1, GPER1, ADM, P2RX2, MYOM2, CASQ1, TMOD1, RARB, PDGFRB, BDNF, RYR1, MAPK12, WNT10B, FHL2, LRRC27, GLMN, ASB2, NFATC4, MAMSTR, FBXO40* |
| CTRL | muscle contraction | 0.000658 | *ATP1A2, FXYD1, TNNT1, SCN3B, TMOD2, C12orf57, CAMK2D, GPER1, P2RX2, MYOM2, CASQ1, TMOD1, RYR1, CACNA1G, PTGER3, TNNI3K, RNF207, GRIP2, ANKRD2, GSTM2, TNNC2, DSP, SMPX, NPPA* |
| CTRL | regulation of cellular component size | 0.001358 | *VEGFA, DMTN, PDXP, SLC12A5, TMOD2, RTN4R, CORO1A, TMOD1, BDNF, SEMA4F, SEMA4A, PRKCD, SLC12A7, SEMA5B, DCC, VILL, NAA80, SEMA3D, TRPV2, SH3BP1, FSTL4, WNT7B, WNT7A, DRAXIN* |
| CTRL | regulation of transporter activity | 1.21E-05 | *NDUFA4, ATP1A2, FXYD1, MEF2C, SCN3B, JPH4, CAMK2D, CACNB3, KCNAB1, PTPN3, CASQ1, CCL2, GRP, CNIH3, PRKCD, CRHR1, KCNS2, FGF11, RNF207, CRH, GSTM2, HAP1, SHANK1, NPPA* |
| CTRL | response to metal ion | 0.0009 | *MT1M, MT1X, MT1E, DMTN, MEF2C, MT1F, CAMK2D, SLC30A3, HAMP, CPNE9, CPNE6, CRIP1, RYR1, GLRA2, CACNA1G, TFR2, INHBB, SMPD3, SYT3, PENK, IMPA2, NFATC4, AQP3, LOXL2* |
| CTRL | energy derivation by oxidation of organic compounds | 0.000866 | *COX7A1, COX6C, NDUFA4, NDUFB4, COX7B, COX7A2, NDUFB1, ATP5PF, NDUFC1, ATP5PD, NDUFB11, NDUFB3, COA6, PPP1R3C, ME3, NDP, MRAP2, PPP1R3G, NOS2, CAVIN3, POMC, NFATC4, PCDH12* |
| CTRL | potassium ion transport | 1.74E-05 | *SLC1A3, ATP1A2, FXYD1, RGS4, SLC12A5, SLC17A6, KCNH3, KCNAB1, KCNJ4, KCNV1, VIP, GRP, KCNH4, SLC12A7, KCNS2, KCNS3, RNF207, KCNAB3, PKD2L1, NPPA, SLC9A2, CDK2* |
| CTRL | regulation of developmental growth | 0.001389 | *VEGFA, HOPX, RGS4, MEF2C, RTN4R, UNC13A, RBP4, CPNE9, CPNE6, AGRN, ARX, BDNF, SEMA4F, SEMA4A, SEMA5B, SYT3, DCC, SEMA3D, TRPV2, FSTL4, WNT2, DRAXIN* |
| CTRL | developmental cell growth | 4.71E-05 | *VEGFA, RGS4, SH3GL2, NRN1, RTN4R, UNC13A, LHX2, PAK6, CPNE9, CPNE6, BDNF, SEMA4F, FLRT3, SEMA4A, SEMA5B, SYT3, DCC, SEMA3D, TRPV2, FSTL4, DRAXIN* |
| CTRL | developmental growth involved in morphogenesis | 6.37E-05 | *VEGFA, SH3GL2, NRN1, RTN4R, UNC13A, LHX2, PAK6, CPNE9, CPNE6, BDNF, SEMA4F, FLRT3, SEMA4A, SEMA5B, SYT3, DCC, SEMA3D, TRPV2, FSTL4, WNT7B, DRAXIN* |
| EAL | positive regulation of cell adhesion | 1.61E-19 | *CD74, HLA-DRA, HLA-DPA1, HLA-DPB1, CD44, S100A10, LGALS1, HLA-DRB5, AIF1, B2M, CD81, CCDC80, HLA-A, ECM2, EDIL3, VCAM1, RHOA, ABI3BP, HLA-E, PREX1, SOX2, SFRP2, HLA-DRB1, HLA-DMB, HLA-DQA1, CCL5, LILRB4, ITPKB, SDC4, PLPP3, HLA-DOA, ITGB2, APBB1IP, HLA-DMA, PTPRC, CD24, CXCL12, HLA-DQB1, HAVCR2, ITGA2, BMP7, IL18, SYK, DOCK8, DOCK1, SELENOK, FLNA, CD4, PTAFR, MEGF10, TJP1, ANGPT1, PDPN, EMILIN1, ITGAV, PYCARD, EMILIN2, DAB2, TNFRSF13C, LGALS9, SPN, UTRN, ANXA1, CD86, ERBB2, NCKAP1L, DOCK5, TRIOBP, TGFBR2, ICOSLG, P2RY12, RASAL3, YES1, LAMB2, ST3GAL4, EFEMP2, NDNF, SOX13, CARD11, COL8A1, ABL1, NLRP3, ITGA6, VAV1, ZFHX3, LILRB1, PRKCQ, CSF1, FN1, ALOX5, COL16A1, ZBTB7B, CD36, MMRN1, HES1, LAMA2, RIN2, LAMA1, SASH3, RSU1, KDR, FCHO1, ACTL6A, EPB41L5, PIEZO1, RRAS, JUP, LYN, IL15, NPNT, PTPN6, DUSP10, ZP3, BTN2A2, CASS4, RREB1, RUNX3, IGF1, HAS2, ITGA5, CCDC88B, FBLN2, TMIGD2, TGFB2, ADA, FERMT1, LEF1, DISC1, WNT4, CD6, GLI2* |
| EAL | small GTPase mediated signal transduction | 1.2E-14 | *PSD2, RND2, AIF1, APOE, LIPA, RASGRP3, RHOA, CDC42EP1, RDX, RHOG, PREX1, RHOU, ITPKB, ARHGDIB, RHOB, TAX1BP3, DHCR24, RRAD, F2RL2, ITGB1, NTRK1, PLEKHG3, COL1A2, LPAR6, CADM4, PLD1, KANK2, ABCA1, DOCK10, DOCK8, DOCK1, LPAR1, STAMBP, MYO9B, ADCYAP1R1, PDPN, HEG1, ITGAV, COL3A1, PLD2, RTKN, RHOQ, RAP1A, ARHGAP22, CDC42EP4, LPAR4, NET1, ARHGAP15, ARHGAP23, NOTCH1, AMOT, DOCK2, WASF2, EPS8, RAPGEF5, ARHGEF40, CYFIP1, DOCK5, GNA12, TAGAP, SPATA13, CDC42EP2, ARHGAP12, RASAL3, FGD3, CDKN2A, NGFR, GNA13, KANK1, CYTH4, ARHGEF1, NUCB2, ARHGAP24, RASA4, SIPA1, DIRAS3, ABL1, VAV1, CSF1, ARHGAP42, SOS2, NTN1, DEF6, PLCE1, WAS, RIN2, CGNL1, ARHGAP30, PHACTR4, ARHGAP45, RAB9A, DOCK7, FGD2, F2RL1, RRAS, PLEKHG4, FBXO8, FBP1, DOK1, PIK3CG, ARHGAP17, PSD4, PLEKHG1, F2R, CCDC125, ARHGAP6, DOCK11, CD2AP, SYDE1, MMD2, ARHGAP18, ARHGAP19, IGF1, TP53, RGL3, TGFB2, ARHGAP27, RAC2, ARHGAP25, GRAP, ARHGAP11A* |
| EAL | positive regulation of cytokine production | 1.26E-12 | *CD74, GPRC5B, HLA-DPA1, C3, AGT, HLA-DPB1, TYROBP, AIF1, B2M, CD81, MBP, HLA-A, TREM2, CSF1R, S100A13, NMB, LAPTM5, HLA-E, SORL1, ARRDC4, CLEC9A, IFNGR1, IL17D, C1QTNF3, PTPRC, CYBA, FCER1G, HAVCR2, CYBB, CD84, IL18, ZBTB20, PSEN1, SYK, SELENOK, IRF8, CD4, TGFB1, PTAFR, HEG1, CLEC7A, PYCARD, C3AR1, TLR4, LGALS9, SPN, CD2, ANXA1, CD86, SPHK1, TLR7, GPSM3, ISL1, OAS1, IFI16, TRAF3IP3, IL16, LACC1, STMP1, IL33, TLR3, CARD8, CARD11, NAIP, BTN3A2, CLEC5A, ABL1, POU2AF1, NLRP3, LURAP1, LILRB1, PRKCQ, BTN3A1, CASP8, UNC93B1, ZBTB7B, CD36, LUM, SASH3, IRF5, TMEM106A, GSDMD, F2RL1, OAS2, CD58, IL17RA, RNF135, HLA-F, PIK3CG, LILRA2, IL15, RBM47, IL6R, ZP3, TLR1, RAB7B, F2R, NFATC4, HPSE, CD40, SULF1, IFIH1, CASP1, CD226, CCDC88B, BTK, PTGER4, TMIGD2, NFAM1, FERMT1, C5, BRCA1, CD6, SPON2, IKBKE, OAS3, CGAS* |
| EAL | chemotaxis | 9.44E-13 | *CD74, ENPP2, FGF1, PADI2, CX3CR1, SEMA4D, SLC12A2, CMTM5, AIF1, TMSB4X, VCAM1, EDNRB, TREM2, RHOA, CSF1R, SEMA3B, TUBB2B, RHOG, PREX1, CCL5, WNK1, ITGB2, FCER1G, RARRES2, PLD1, CXCL12, ITGA2, RAB13, GAB1, SYK, SBDS, LPAR1, ST6GAL1, MMP2, CXCL16, TGFB1, PTAFR, CYP7B1, GPR183, LGR6, ANGPT1, VEGFB, THBS4, ITGAV, MOSPD2, C3AR1, CMTM3, JAM3, LGALS9, SPN, NOTCH1, AMOT, DOCK2, CXCR4, SPI1, ANXA1, SEMA6A, PLEC, GPSM3, NCKAP1L, SEMA3D, S100A4, P2RY12, BIN2, CSF3R, CMTM7, IL16, PLGRKT, SLC8B1, NINJ1, CORO1B, ANO6, CCL4, ACKR3, VAV1, PRKCQ, CSF1, ALOX5, ANOS1, NTN1, CYSLTR1, SEMA5A, HBEGF, TNFAIP6, KDR, F2RL1, SEMA3G, TAFA4, CCR1, CKLF, CMKLR1, IL17RA, PLAU, LYN, FER, PIK3CG, RIN3, DAPK2, IL6R, PRSS56, MSTN, GPNMB, CXCL5, EDN3, WNT3, TGFB2, RAC2, ACKR2, ECSCR, LEF1, C5, ARHGEF16* |
| EAL | wound healing | 5.67E-16 | *FGF1, DDR1, HBB, CD9, CD44, SLC12A2, S100A10, APOE, ENTPD2, CSRP1, MYLK, RHOA, DDR2, AQP1, SLC7A11, SDC4, ERBB3, TSPAN8, ANXA5, DST, PLPP3, F2RL2, ITGB1, CADM4, FCER1G, ITGA2, MCAM, AHNAK, TLN1, SYK, F5, FLNA, ENTPD1, TGFB1, ADAMTS18, PDPN, ANXA2, EMILIN1, CD109, CLEC7A, COL3A1, MYL9, TLR4, EMILIN2, STXBP3, C1QTNF1, TGFBR1, ELK3, CXCR4, FBLN1, ANXA1, AK3, CYP4F11, ERBB2, PLEC, VPS4B, GNA12, MYL12A, P2RY12, PRCP, GNA13, ST3GAL4, KANK1, NDNF, SYTL4, AXL, ARHGAP24, PLEK, CORO1B, ANO6, FKBP10, VAV1, CASK, CLIC1, P2RY1, PRKCQ, FN1, ALOX5, CD151, NFATC1, CD36, MMRN1, WAS, HBEGF, KDR, PPARA, PLAT, MYOF, F2RL1, CFLAR, CHMP6, PLAU, LYN, PIK3CG, PTPN6, PRSS56, F2R, RREB1, HPSE, CD40, OCLN, PROCR, IGF1, ITGA5, FERMT3, MYOZ1, TGFB2, FERMT1, WNT4, PAFAH2, PEAR1, TNFAIP3* |
| EAL | leukocyte cell-cell adhesion | 1.37E-14 | *CD74, HLA-DRA, HLA-DPA1, CX3CR1, HLA-DPB1, SEMA4D, CD44, LGALS1, HLA-DRB5, AIF1, B2M, CD81, CERCAM, HLA-A, VCAM1, RHOA, SELPLG, EZR, LAPTM5, HLA-E, FGL2, FOXJ1, HLA-DRB1, HLA-DMB, HLA-DQA1, OLR1, CCL5, LILRB4, ITPKB, SDC4, WNK1, HLA-DOA, ITGB1, ITGB2, HLA-DMA, PTPRC, CD24, CXCL12, HLA-DQB1, HAVCR2, MSN, BMP7, IL18, SYK, DOCK8, SELENOK, CD4, PAWR, PTAFR, PYCARD, TNFRSF13C, LGALS9, SPN, JAM2, ANXA1, CD86, ERBB2, NT5E, NCKAP1L, SLC4A2, TGFBR2, ICOSLG, SOCS6, RASAL3, YES1, ST3GAL4, SOX13, CARD11, ABL1, NLRP3, TWSG1, VAV1, DAPL1, LILRB1, PRKCQ, SELL, ALOX5, ZBTB7B, ITGAL, HES1, SASH3, PLA2G5, FCHO1, ACTL6A, PPARA, TNFAIP8L2, LYN, IL15, PTPN6, DUSP10, ZP3, HFE, LOXL3, BTN2A2, GPNMB, STK10, RUNX3, IGF1, HAS2, ITGA5, FERMT3, CCDC88B, TMIGD2, RAC2, ADA, LEF1, CD6, GLI2* |
| EAL | gliogenesis | 5.43E-21 | *MOBP, MAG, DAAM2, CNP, ABCA2, METRN, CNTN2, CX3CR1, MYRF, PHGDH, CD9, PLP1, GFAP, FA2H, NTRK2, TUBA1A, GPM6B, OLIG1, DNER, SIRT2, HAPLN2, GPR37L1, ID4, NKX6-2, KCNJ10, TREM2, RHOA, CSF1R, CERS2, MAL, GJC2, NFIA, TMEM98, SOX2, VCAN, OPALIN, NDRG1, SOX8, SOX10, ZEB2, ERBB3, ATP1B2, SUN2, IFNGR1, PLPP3, ASPA, BOK, ITGB4, SLC45A3, BCAN, ASCL1, LRP2, PSEN1, LPAR1, TGFB1, OLIG2, GPR183, NKX2-2, PTPRZ1, NKX2-1, LRP1, COL3A1, TLR4, MXRA8, ZNF488, C1QA, NAGLU, NOTCH1, GRN, MMP14, CXCR4, ANXA1, ERBB2, TSPO, PLEC, SH3TC2, P2RY12, POU3F2, APCDD1, NKX6-1, LAMB2, IL33, SOX13, ABL1, HDAC1, LAMC3, P2RY1, CSF1, NTN1, CLCN2, CYSLTR1, HES1, LAMA2, RRAS, TSPAN2, LYN, SOX11, DUSP10, TAL1, HES5, SMO, TP53, TGFB2, LEF1, DISC1, CDKN2B* |
| EAL | actin filament organization | 3.62E-10 | *TF, DAAM2, GSN, ERMN, MARCKSL1, MARCKS, S100A10, RND2, AIF1, TMSB4X, RHOA, CDC42EP1, ADD3, EZR, RDX, RHOG, PREX1, USH1C, WIPF1, DPYSL3, TTN, RHOU, KANK4, SDC4, ZEB2, RHOB, HIP1R, RNH1, MYO1D, ENAH, CXCL12, AIF1L, FAT1, KANK2, NEBL, ELN, LPAR1, COTL1, FLNA, ITGB5, PAWR, GDPD2, TJP1, CFL2, MYO6, MYO1E, PYCARD, SHROOM4, RHOQ, CAPG, INF2, CDC42EP4, HIP1, PLS3, TGFBR1, WASF2, ARPC1B, EPS8, PLEC, CYFIP1, NCKAP1L, LCP1, ZBED3, TRIOBP, CDC42EP2, ARHGAP12, SCIN, SHROOM1, KANK1, HCLS1, TAGLN2, PLEK, CORO1B, LIMA1, MYO1F, ABL1, WASHC4, SYNPO2, WASHC5, SEMA5A, WAS, CGNL1, GAS2, SSH3, F2RL1, MYO5C, DIAPH3, HCK, FER, ARHGAP17, IQGAP2, LMOD1, ARHGAP6, TACR1, CD2AP, ARHGAP18, FCHSD1, ALMS1, PTGER4, RAC2, ARHGAP25, WNT4, PLEKHH2, ANG* |
| EAL | positive regulation of cell activation | 3.01E-14 | *CD74, HLA-DRA, HLA-DPA1, HLA-DPB1, LGALS1, HLA-DRB5, TYROBP, AIF1, B2M, CD81, HLA-A, CAPN3, VCAM1, TREM2, RHOA, DDR2, HLA-E, LAMP1, INPP5D, HLA-DRB1, HLA-DMB, CD38, HLA-DQA1, CCL5, LILRB4, ITPKB, HLA-DOA, ITGB2, HLA-DMA, PTPRC, CD24, HLA-DQB1, HAVCR2, ACTA2, IL18, SYK, DOCK8, SELENOK, FLNA, CD4, TGFB1, PTAFR, GPR183, CLEC7A, PYCARD, ITGAM, TLR4, TNFRSF13C, LGALS9, CEBPA, SPN, VAMP8, CD2, MMP14, SPI1, ANXA1, CD86, NCKAP1L, TGFBR2, ICOSLG, RASAL3, YES1, IL33, AXL, SOX13, RPS6KA1, PLEK, CARD11, ABL1, NLRP3, VAV1, LILRB1, PRKCQ, GAB2, ZBTB7B, HES1, SASH3, NFATC2, FCHO1, ACTL6A, CTSC, F2RL1, HLA-F, LYN, LILRA2, IL15, PTPN6, DUSP10, ZP3, BTN2A2, TACR1, KMT5C, RUNX3, CD40, CD226, IGF1, CCDC88B, BTK, TMIGD2, ADA, LEF1, CD6, GLI2* |
| EAL | mononuclear cell differentiation | 1.22E-08 | *CD74, HLA-DRA, LGALS1, B2M, RPS6, RPL22, VCAM1, LIPA, TREM2, HLA-B, RHOA, CSF1R, ZFP36L2, TMEM98, PREX1, FGL2, INPP5D, ZFP36L1, FOXJ1, HLA-DRB1, LILRB4, ITPKB, ITGB8, HLA-DOA, ITGB1, NTRK1, PTPRC, FCER1G, IL18, DOCK10, PSEN1, SYK, TMEM176B, BLNK, LFNG, IRF8, CD4, TMEM176A, TGFB1, GPR183, LGALS9, SPN, CD3D, DOCK2, ITM2A, CD2, MMP14, SPI1, ANXA1, CD86, ZEB1, ERBB2, FBXO7, NCKAP1L, SLC4A2, TGFBR2, IFI16, LYL1, CMTM7, IKZF1, AXL, SOX13, CARD11, PIR, ABL1, POU2AF1, NLRP3, VAV1, LILRB1, HHEX, CSF1, NFATC1, SOS2, MFNG, ZBTB7B, SASH3, PATZ1, ACTL6A, F2RL1, TCF7, LYN, IL15, PTPN6, IL6R, DUSP10, LOXL3, BTN2A2, DOCK11, RUNX3, ATP7A, TP53, BTK, PTGER4, ADA, NFAM1, LEF1, WNT4, GLI2, TCIRG1, RUNX2, PRDM1, CD8A* |
| EAL | leukocyte migration | 1.29E-12 | *CD74, PADI2, CX3CR1, CD9, APOD, SLC12A2, CD99, AIF1, CD81, VCAM1, EDNRB, TREM2, RHOA, CSF1R, SELPLG, PREX1, FOXJ1, CCL5, WNK1, ITGB1, ITGB2, FCER1G, RARRES2, CXCL12, MSN, ITGA2, SYK, DOCK8, SBDS, SELENOK, MMP2, CXCL16, PTAFR, CYP7B1, GPR183, VEGFB, THBS4, EMILIN1, MOSPD2, PYCARD, C3AR1, JAM3, ITGA7, LGALS9, SPN, MMP14, CXCR4, JAM2, SPI1, ANXA1, EPS8, PLEC, GPSM3, NCKAP1L, P2RY12, CSF3R, IL16, SLC8B1, YES1, ST3GAL4, NINJ1, IL33, ANO6, CCL4, ABL1, ITGA6, VAV1, CSF1, SELL, ALOX5, ITGAL, TNFAIP6, IRAK4, F2RL1, HCK, TAFA4, CCR1, CKLF, CMKLR1, IL17RA, PLVAP, LYN, FER, PIK3CG, RIN3, DAPK2, IL6R, ZP3, PRSS56, MSTN, TACR1, CXCL5, STK10, EDN3, PTGER4, TGFB2, RAC2, ADA, C5* |
| EAL | leukocyte proliferation | 5.12E-14 | *CD74, HLA-DPA1, HLA-DPB1, TYROBP, AIF1, CD81, RPS6, HLA-A, VCAM1, LIPA, TREM2, CSF1R, LST1, NMB, HLA-E, INPP5D, FOXJ1, HLA-DRB1, HLA-DMB, CD38, CCL5, LILRB4, SDC4, PTPRC, CD24, CSF2RA, HAVCR2, MSN, IL18, SYK, DOCK8, SELENOK, ST6GAL1, CD22, PAWR, GPR183, PYCARD, TLR4, TNFRSF13C, LGALS9, SPN, DOCK2, ANXA1, CD86, ERBB2, NCKAP1L, SLC4A2, TGFBR2, MNDA, ICOSLG, GAPT, RASAL3, IL33, CARD11, ABL1, TWSG1, LILRB1, PRKCQ, HHEX, CSF1, BTN3A1, CD151, SOS2, ZBTB7B, HES1, SASH3, PLA2G5, NFATC2, F2RL1, ELF4, LYN, PIK3CG, IL15, PTPN6, SOX11, ZP3, BTN2A2, GPNMB, TACR1, CD40, IGF1, TP53, CCDC88B, BTK, CSF2RB, TMIGD2, RAC2, ADA, LEF1, WNT4, CD6, TCIRG1, TNFAIP3, CD180* |
| EAL | negative regulation of response to external stimulus | 6.92E-06 | *PADI2, A2M, CD9, SEMA4D, SLC12A2, SPX, AIF1, APOE, SIRT2, HLA-A, TREM2, HLA-B, ERBIN, CERS2, SEMA3B, HLA-E, FGL2, HLA-DRB1, NENF, TSPAN8, C1QTNF3, RGMA, LTF, PTPRC, BACE1, HAVCR2, SYK, ST6GAL1, RNF125, TGFB1, ADAMTS18, ANXA2, CD109, LGALS9, C1QTNF1, SPN, NOTCH1, GRN, LILRA4, TSPAN6, SEMA6A, NT5E, ISL1, SEMA3D, ACP5, OAS1, IFI16, AOAH, YES1, IL33, CARD8, RHBDF2, CORO1B, NLRP3, CASK, LILRB1, ALOX5, MMRN1, SEMA5A, PARP14, TNFAIP6, TRAFD1, PPARA, PLAT, TNFAIP8L2, F2RL1, ELF4, SEMA3G, HCK, PLAU, HLA-F, TRIM38, LYN, LILRA2, RIN3, PTPN6, DUSP10, IL10RA, RAB7B, IGF1, MYOZ1, PTGER4, ZDHHC12, WNT3, TRIM21, TRIM45, ADA, C5, WNT4, TNFAIP3, OAS3, CGAS* |
| EAL | muscle system process | 1.58E-06 | *GSN, AGT, GJA1, SSPN, ATP1A2, SPX, PGAM2, TRDN, GATM, MYLK, EDNRB, RHOA, PI16, DTNA, CD38, FXYD1, TTN, KCNE5, SNTA1, CYBA, SNTB1, CTNNA3, ACTA2, ITGA2, STRIT1, PPP1R13L, FLNA, PTAFR, SYNM, VEGFB, MYL9, PIK3C2A, PDLIM5, NOTCH1, UTRN, HEY2, CXCR4, MYL3, SPHK1, RYR1, MYH14, DOCK5, LMNA, MYOT, APBB2, MYH11, RYR3, PDE9A, TRPC3, P2RY1, LMCD1, RCSD1, ARHGAP42, MEIS1, NFATC1, SELENON, SGCD, PLCE1, PPARA, ABCC9, MYOF, KCNJ5, MYL5, CFLAR, JUP, CASQ2, PLN, KCNQ1, PIK3CG, ADRB2, NPNT, TMEM38B, KCNN2, LMOD1, F2R, MSTN, TACR1, TBX2, ADRA1A, CKMT2, SULF1, IGF1, EDN3, MYOZ1, KCNE3, ADA, KCNA5, EDNRA, CCDC78, GSTM2* |
| EAL | extracellular matrix organization | 3.25E-14 | *DDR1, AGT, ANTXR1, GFAP, AEBP1, CCDC80, GPM6B, HAPLN2, ECM2, ADAMTS4, CHADL, HPSE2, ABI3BP, DDR2, COL9A2, COL4A5, SFRP2, COL18A1, COL9A3, ITGB1, CTSS, PBXIP1, COL1A2, MATN2, CRTAP, PHLDB1, MFAP4, ELN, COL1A1, MMP2, TGFB1, ADAMTS18, PDPN, ANXA2, EMILIN1, VWA1, LRP1, MYO1E, COL3A1, LOXL4, TGFBR1, NOTCH1, MMP14, FBLN1, COL8A2, SMOC1, LCP1, ADAMTSL3, COL15A1, RAMP2, LAMB2, EFEMP2, NDNF, COL8A1, PRDX4, MYH11, FKBP10, ABL1, COLGALT2, HPN, OLFML2A, PRDM5, COL16A1, ADAM15, COL27A1, PLOD3, LUM, LAMA2, LAMA1, COL9A1, FMOD, GAS2, COL14A1, ADAMTS14, NID2, CFLAR, SLC2A10, NPNT, TMEM38B, LOXL3, PXDN, SULF1, COL12A1, LOXL1, COL11A2, HAS2, ATP7A, TGFB2, FERMT1* |
| EAL | regulation of body fluid levels | 9.57E-10 | *DDR1, APLNR, AQP4, HBB, CD9, APOE, ENTPD2, CSRP1, APLN, EDNRB, AQP1, SLC7A11, GNAI2, TSPAN8, WNK1, ANXA5, F2RL2, CYBA, FOXB1, CCND1, FCER1G, ITGA2, TLN1, ZNF385A, SYK, F5, FLNA, ENTPD1, ADAMTS18, CYP4F12, PDPN, ANXA2, EMILIN1, HEG1, USF2, COL3A1, MYL9, TLR4, EMILIN2, STXBP3, C1QTNF1, VAMP8, FBLN1, AK3, CYP4F11, GNA12, MYL12A, P2RY12, GNA13, ST3GAL4, AXL, PLEK, ANO6, AQP6, VAV1, CLIC1, STAT5A, HK2, P2RY1, PRKCQ, ZBTB7B, CD36, MMRN1, WAS, CTNS, PLAT, F2RL1, AQP5, OAS2, PLAU, LYN, PIK3CG, PTPN6, FLI1, PRSS56, F2R, HPSE, CD40, PROCR, HAS2, ATP7A, FERMT3, ADA, PAFAH2, PEAR1, SLC4A5* |
| EAL | regulation of immune effector process | 4.97E-08 | *CD74, HLA-DRA, GPRC5B, C3, TRIL, CX3CR1, A2M, TYROBP, B2M, CD81, TMBIM6, HLA-A, TREM2, HLA-B, LITAF, LAPTM5, HLA-E, LAMP1, FGL2, FOXJ1, HLA-DRB1, HLA-DMB, LILRB4, ITGB2, PTPRC, HAVCR2, CD84, IL18, SYK, CD22, HLA-C, TGFB1, PTAFR, ANGPT1, CLEC7A, PYCARD, ITGAM, TLR4, LGALS9, SPN, VAMP8, GRN, SPI1, ANXA1, CD86, TLR7, NCKAP1L, PRAM1, ACP5, NCF1, LACC1, IL33, AXL, TLR3, NLRP3, SVEP1, VAV1, LILRB1, APPL2, GAB2, ZBTB7B, CD36, WAS, SASH3, IRF5, PLA2G5, F2RL1, HLA-F, LYN, FER, PTPN6, DUSP10, ZP3, HFE, LOXL3, DDX60, KMT5C, CD40, CD226, BTK, TGFB2, APLF, RAC2, SPON2, CGAS* |
| EAL | cell activation involved in immune response | 7.21E-13 | *CD74, HLA-DRA, CX3CR1, LGALS1, TYROBP, CD81, PTGDS, RPS6, TREM2, S100A13, TMEM98, LAMP1, FGL2, HLA-DRB1, HLA-DMB, ITGB2, APBB1IP, PTPRC, FCER1G, HAVCR2, CD84, IL18, DOCK10, PSEN1, SYK, LFNG, IRF8, TGFB1, PTAFR, GPR183, LRP1, PYCARD, ITGAM, TLR4, LAT2, LGALS9, STXBP3, SPN, VAMP8, DOCK2, ITM2A, GRN, SPI1, ANXA1, CD86, NKG7, NCKAP1L, LCP1, PRAM1, GAPT, SNAP23, IL33, ABL1, POU2AF1, NLRP3, LILRB1, MFNG, GAB2, ZBTB7B, ITGAL, IFI35, F2RL1, HLA-F, LYN, FER, PIK3CG, LILRA2, PTPN6, IL6R, MILR1, LOXL3, DOCK11, KMT5C, CD40, ATP7A, TP53, BTK, PTGER4, APLF, RAC2, ADA, LEF1, CD180* |
| EAL | cell growth | 0.002675 | *MAG, DDR1, TSC22D4, AGT, S100B, GJA1, SEMA4D, RND2, TNC, APOE, PI16, SEMA3B, SFRP2, CD38, ITGB1, RGMA, FRZB, CXCL12, ALCAM, IGFBP7, NPM1, TP53TG5, DNM2, CXCL16, TGFB1, PDLIM5, SGK2, DAB2, SGK3, TGFBR1, NET1, MMP14, CXCR4, SPHK1, SEMA6A, ERBB2, CYFIP1, SEMA3D, TGFBR2, SPART, SLC25A33, CRABP2, CDKN2A, NKX6-1, LAMB2, RPS6KA1, SIPA1, ABL1, OSGIN2, HPN, PRKCQ, FN1, MEIS1, ADAM15, NTN1, SEMA5A, PLCE1, HBEGF, IMPACT, JADE3, PPARA, LTBP4, EPB41L5, EGFR, SEMA3G, FBP1, ENPP1, ADRA1A, EAF2, FLRT1, IGF1, EDN3, TP53, WNT3, TGFB2, SERTAD3, SOX17, OSGIN1, DISC1, BRCA1, EDNRA, KIF26A* |
| EAL | carboxylic acid biosynthetic process | 6.91E-10 | *SCD, CD74, CARNS1, CBR1, QKI, PHGDH, PLP1, APOC1, ELOVL1, FA2H, FADS2, PTGDS, UST, GATM, SIRT2, SCD5, MID1IP1, ACSM5, ACSBG1, PSAT1, LTC4S, CPS1, FADS1, CYP27A1, SLC45A3, ELOVL5, FABP5, APOC2, DHRS9, RBP1, SYK, CYP7B1, SERINC5, PTGS1, PYCARD, TBXAS1, SCP2, PYCR2, HPGDS, SDS, HAAO, ANXA1, CYP4F11, BHMT2, RGN, AKR1C3, AASS, HSD17B8, HOGA1, HACD4, NAIP, AKR1A1, ABCD3, ALDH1A1, ERLIN2, ALOX5, ELOVL2, PLOD3, PLA2G5, DHFR, OSBPL9, CHST14, MTR, SDSL, CES1, DHFR2, SHMT1, ACLY, LIPG, MRI1, ASAH2, PCBD2, CASP1, PECR, ABHD1, ACADL, ABCD1, RDH10, BRCA1, HACD1, GSTM2* |
| EAL | response to virus | 6.86E-05 | *TPT1, NPC2, SIRT2, TREM2, ERBIN, RPS15A, IFI44L, NMB, FGL2, ITGAX, CCL5, ITGB8, IFNGR1, PTPRC, CXCL12, ACTA2, SELENOK, RNF125, SERINC5, APOBEC3C, PYCARD, APOBEC3G, LGALS9, SPN, VAMP8, LILRA4, CXCR4, TSPAN6, TLR7, GBP1, IFI27, IFIT2, SLFN11, IVNS1ABP, OAS1, IFI16, GBP3, IL33, TLR3, CARD8, CCL4, WDFY4, POU2AF1, NLRP3, RNASE6, LILRB1, UNC93B1, TRIM22, IFIT3, BTBD17, GSDME, IRF5, IFI44, ABCC9, F2RL1, TRIM34, OAS2, IKBKB, IL17RA, RNF135, TRIM38, IL15, DDX60L, GBP2, RAB7B, DDX60, HERC5, CD40, IFIH1, CASP1, IFNLR1, RTP4, MX2, ZDHHC12, TRIM21, VWCE, SPON2, TNFAIP3, IKBKE, OAS3, CGAS* |
| CAL | regulation of inflammatory response | 8.52E-10 | *HAMP, S100A8, S100A12, S100A9, TLR2, CTSC, ALOX5AP, TNFRSF1B, SLAMF8, SIGLEC10, IL1B, PIK3AP1, FCGR1A, LPL, IER3, CASP4, MAPK13, RHBDF2, WNT5A, ADORA2B, GPSM3, PTGES, IL10RA, TLR7, AOAH, PPARG, TNFAIP3, CASP1, CARD16* |
| CAL | positive regulation of cytokine production | 1.32E-06 | *CD14, TLR2, SLC11A1, IL27RA, LY96, TLR5, RUNX1, CLEC4E, IL1B, CCBE1, LPL, POU2F2, P2RX7, C3AR1, MAPK13, RBM47, TICAM1, C5AR1, WNT5A, ADORA2B, GPSM3, EBI3, TLR7, IRAK3, CASP1, NFAM1* |
| CAL | defense response to bacterium | 1.56E-09 | *CHGA, HAMP, S100A8, S100A12, S100A9, TLR2, ARG2, PLAC8, SLC11A1, IL27RA, SLAMF8, KLK7, CLEC4E, PPBP, GNLY, IL1B, FCGR1A, CASP4, STAB1, P2RX7, RNASE6, C5AR1, GBP2, LYZ, CASP1* |
| CAL | response to molecule of bacterial origin | 1.5E-08 | *S100A8, CD14, S100A9, TLR2, SLC11A1, LY96, TNFRSF1B, PCK1, PPBP, IL1B, C2, P2RX7, TICAM1, SMAD6, C5AR1, GBP2, WNT5A, IL10RA, THBD, CD180, PTGER1, TNFAIP3, IRAK3, CASP1, CARD16* |
| CAL | negative regulation of response to external stimulus | 0.000177 | *SPP1, HAMP, VSIG4, ANGPT2, ARG2, TNFRSF1B, SLAMF8, SIGLEC10, CARTPT, IER3, RHBDF2, WNT5A, IL10RA, THBD, TRIM38, AOAH, PPARG, TNFAIP3, IRAK3, CARD16, NLRC5* |
| CAL | leukocyte mediated immunity | 0.00082 | *CHGA, C1QB, C1QC, C1QA, CTSC, IL27RA, TNFRSF1B, IL21R, IL1B, FCGR1A, C2, P2RX7, TICAM1, STXBP2, ADORA2B, CD300A, BTN3A3, SHLD3, WAS* |
| CAL | regulation of immune effector process | 8.56E-05 | *VSIG4, IL27RA, TNFRSF1B, SLAMF8, KLK7, PCK1, IL1B, FCGR1A, P2RX7, TICAM1, HLX, STXBP2, WNT5A, ADORA2B, CD300A, TLR7, SHLD3, IRAK3, WAS* |
| CAL | adaptive immune response based on somatic recombination of immune receptors built from immunoglobulin superfamily domains | 0.000192 | *C1QB, C1QC, C1QA, CTSC, SLC11A1, IL27RA, TNFRSF1B, IL21R, IL1B, FCGR1A, C2, P2RX7, HLX, EBI3, BTN3A3, SHLD3, TNFAIP3, WAS* |
| CAL | humoral immune response | 1.07E-06 | *C1QB, C1QC, C1QA, S100A12, S100A9, VSIG4, SLC11A1, KLK7, PPBP, GNLY, IL1B, C2, POU2F2, RNASE6, CFB, LYZ, EBI3, CFD* |
| CAL | positive regulation of response to biotic stimulus | 0.000133 | *CD14, TLR2, LY96, TLR5, KLK7, CLEC4E, PIK3AP1, RBM47, TICAM1, GBP2, WNT5A, CD300A, CD180, TLR7, TNFAIP3, IRAK3, CASP1, NLRC5* |
| CAL | carboxylic acid transport | 0.000222 | *SLC38A2, AKR1C1, SLC11A1, SLC1A7, IL1B, SLC27A2, P2RX7, AQP9, SLCO2A1, PTGES, SLC1A5, SLC26A2, SLC47A1, SLC13A5, PPARG, SLC26A6, SLC7A7* |
| CAL | negative regulation of cell development | 6.75E-05 | *THY1, SPP1, C1QC, TNFRSF11B, MAFB, RUNX1, LILRB3, CARTPT, IL1B, RFLNB, HLX, WNT5A, MYC, SNAI2, RFLNA, TMEM131L* |
| CAL | cellular response to biotic stimulus | 9.59E-05 | *CD14, TLR2, LY96, TNFRSF1B, PPBP, IL1B, CDA, TICAM1, GBP2, WNT5A, CD180, TNFAIP3, IRAK3, CASP1, CARD16* |
| CAL | leukocyte chemotaxis | 3.11E-05 | *CHGA, S100A8, S100A12, S100A9, SLAMF8, PPBP, IL1B, C3AR1, CCR1, CH25H, C5AR1, ITGA9, WNT5A, GPSM3, HSD3B7* |
| CAL | positive regulation of DNA-binding transcription factor activity | 3.76E-05 | *S100A8, S100A12, S100A9, TLR2, IL1B, ZIC2, NHLH2, TICAM1, WNT5A, TRIM38, FZD2, PPARG, IRAK3, CARD16, NFAM1* |
| CAL | phagocytosis | 0.001253 | *CD14, TLR2, CD93, SLC11A1, MSR1, IL1B, FCGR1A, C2, P2RX7, CD300A, ARHGAP25, IL15RA* |
| CAL | potassium ion transport | 0.001444 | *KCNS1, KCNG1, FXYD3, SLC12A8, KCNJ11, KCNMB2, GJA5, NPPA, KCNE3, KCNK6, GAL, KCNG3* |
| CAL | regulation of blood pressure | 0.00015 | *CHGA, SLC2A5, CARTPT, HSD11B2, IER3, ERAP2, DRD5, GJA5, NPPA, KCNK6, NPY, PPARG* |
| CAL | negative regulation of immune response | 0.001245 | *VSIG4, ARG2, IL27RA, SLAMF8, RHBDF2, HLX, CD300A, PPARG, TNFAIP3, IRAK3, NLRC5* |
| CAL | response to organophosphorus | 1.86E-05 | *AKR1C1, PCK1, IL1B, P2RX7, AQP9, KCNJ11, THBD, SDC1, TLR7, SLC26A6, STC1* |
| CIL | positive regulation of cytokine production | 0.000325 | *HSPA1B, HSPA1A, HSPB1, MDK, HSP90AA1, HMGB2, HSPD1, MBP, DDIT3, IL1RL1, THBS1, ADCYAP1, CGAS, TWIST1, H19* |
| CIL | response to steroid hormone | 2.86E-06 | *HSPA1B, HSPA1A, HMGB2, CDKN1A, FOS, TXNIP, FKBP4, CRY2, SST, NPAS4, AQP1, DDIT4, EDN1, THBS1, AVPR1A* |
| CIL | response to unfolded protein | 2.03E-11 | *DNAJB1, HSPA1A, HSPA6, BAG3, HSPB1, SERPINH1, HSPH1, HSP90AA1, DNAJB4, HSPD1, HSPA4L, HSPA5, DDIT3, MANF, THBS1* |
| CIL | chemotaxis | 0.000538 | *HSPB1, TUBB2B, MDK, HMGB2, LPAR1, CCN1, CMTM5, EDN1, NRP1, CALCA, THBS1, CXCL1, CCR6, CXCL2* |
| CIL | response to heat | 4.92E-12 | *HSPA1B, DNAJB1, HSPA1A, HSPA6, BAG3, HSPB1, HSP90AA1, CDKN1A, DNAJB4, CRYAB, MICB, CALCA, MICA, THBS1* |
| CIL | cellular response to chemical stress | 3.92E-05 | *HSPA1B, HSPA1A, NQO1, SOD2, FOS, JUN, DDIT3, YBX3, AQP1, EDN1, MPV17L2, FAS, H19* |
| CIL | renal system development | 4.9E-05 | *SDC4, AQP1, ODC1, COL4A1, NRP1, GPR4, GFRA1, HS3ST3B1, BMP2, NID1, SIX4, COL4A4, WNT6* |
| CIL | response to lipopolysaccharide | 0.000101 | *HMGB2, NQO1, SOD2, VIM, FOS, EDN1, CSF3, TRIB1, CASP7, CXCL1, NFKBIZ, NOCT, CXCL2* |
| CIL | reactive oxygen species metabolic process | 8.67E-06 | *NQO1, CDKN1A, GPX3, SOD2, PDK4, CRYAB, GADD45A, CCN1, DDIT4, EDN1, THBS1, H19* |
| CIL | cellular response to biotic stimulus | 0.000139 | *HMGB2, VIM, TXNIP, HSPA5, DDIT3, CSF3, TRIB1, CASP7, CXCL1, NFKBIZ, CXCL2* |
| CIL | extrinsic apoptotic signaling pathway | 3.77E-05 | *HSPA1B, HSPA1A, BAG3, HMGB2, MAL, MKNK2, ICAM1, NRP1, THBS1, NFKBIZ, FAS* |
| CIL | multi-organism reproductive process | 1.42E-05 | *FOS, FKBP4, TPPP3, RGS2, IGFBP5, EDN1, CALCA, AVPR1A, ADCYAP1, PNOC, CRH* |
| CIL | negative regulation of growth | 7.47E-05 | *HSPA1B, HSPA1A, CDKN1A, CRYAB, TSPYL2, MT1A, RGS2, IGFBP5, NRP1, MSX1, GDF15* |

CTRL: Control; EAL: Early Active Lesion; CAL: Chronic Active Lesion; CIL: Chronic Inactive Lesion.
