# Supplementary material for: Stage-Specific Gene Expression Profiles in Multiple Sclerosis Cortical Lesions Identified via Spatial Transcriptomics
Source: Research Square preprint supplement (doi:10.21203/rs.3.rs-7270797/v1), 2025-08-19
Supplement: Supplementary file 2 [file 71ff38d082994e6dd3053c3e.docx]

**Supplementary Table 1. Primary and secondary antibodies used in this study**

|  | Origin | Target | Dilution | Antigen retrieval | Source |
| --- | --- | --- | --- | --- | --- |
| CD68 | Mouse (mAB, IgG3) | Cluster of Differentiation 68 (CD68) | 1:100 | EDTA pH 9 | M087601-2; Agilent |
| PLP | Mouse (mAB, IgG2a) | Proteolipid protein (PLP) | 1:500 | EDTA pH 9 | MCA839G; BioRad |
| CD20 | Mouse (mAB, IgG1) | Cluster of Differentiation 20 (CD20) | 1:250 | EDTA pH 9 | MAB348; Merck |
| CD3 | Rabbit (pAB) | Cluster of Differentiation 3 (CD3) | 1:100 | EDTA pH 9 | A0452; Agilent |
| Goat α-mouse. Biotinylated secondary antibody | Goat |  | 1:400 | - | Vector BA-9200 |
| Goat α-rabbit. Biotinylated secondary antibody | Goat |  | 1:200 | - | Vector BA-1000 |
