# Supplementary material for: Stage-Specific Gene Expression Profiles in Multiple Sclerosis Cortical Lesions Identified via Spatial Transcriptomics
Source: Research Square preprint supplement (doi:10.21203/rs.3.rs-7270797/v1), 2025-08-19
Supplement: Supplementary file 3 [file e3f15c91f437fa06b0af3036.docx]

**Supplementary Table 2.** Summary of spots and gene expression data per sample in the Spatial Transcriptomics assay.

| **Sample** | **Spots under tissue** | **Genes per spot** |
| --- | --- | --- |
| **Control 1** | 2544 | 2090 |
| **Control 2** | 2776 | 2917 |
| **Chronic Active 1** | 3239 | 1962 |
| **Chronic Active 2** | 3686 | 2888 |
| **Early Active** | 3111 | 1803 |
| **Chronic Inactive 1** | 3148 | 1585 |
| **Chronic Inactive 2** | 4257 | 2375 |
